# Supplementary material
Source: Springer Nature journal article supplement (https://www.springermedizin.de/resource/supplementary/12936_2011_1814_MOESM6_ESM.pdf/9541798)

EIR

600  
500  
400  
300  
200  
100  
0

Nov. Dec. Jan. Feb. May Jun. Jul. Aug.

Dry

Wet

Month

- Ag (Asutifi)
- Ag (Tano N/S)
- Af (Tano)
- Af (Asutifi)

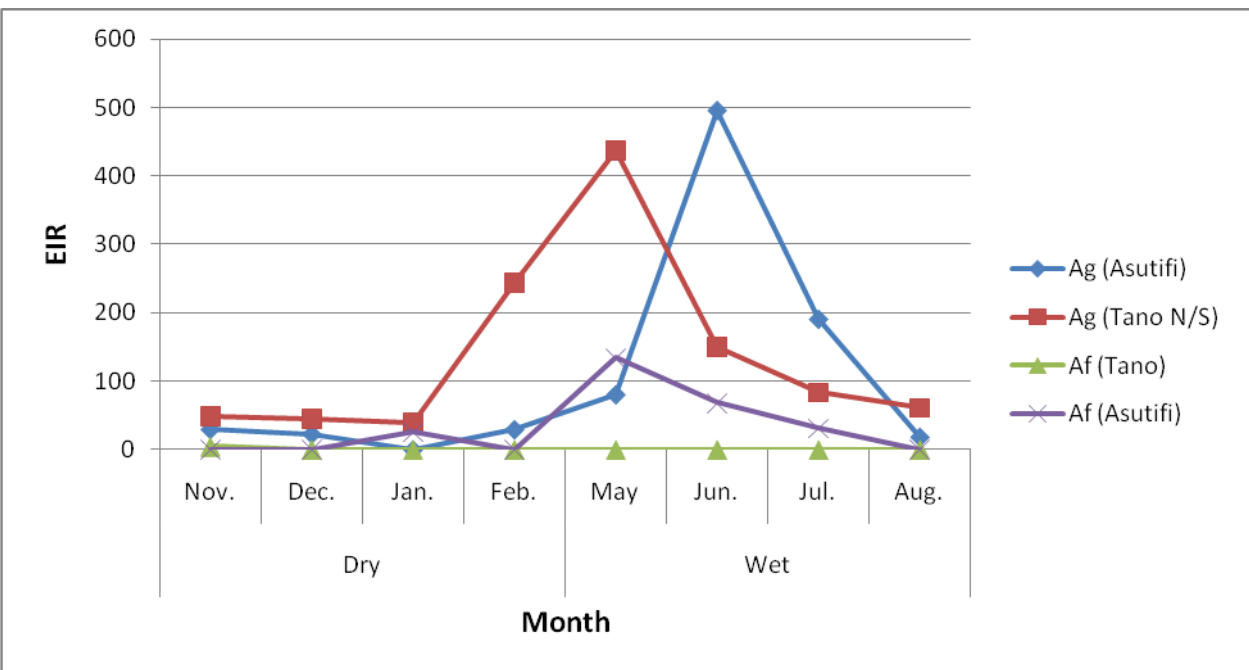

Supplement: MOESM6 [file 9541798]
